# Supplementary material for: Social Determinants of Health and Cardiovascular Risk among Adults with Diabetes: The Reasons for Geographic and Racial Differences in Stroke (REGARDS) Study
Source: PubMed Central journal article supplement — Diabetes Metab J. 2024 Jul 22;48(6):1073–83. doi: 10.4093/dmj.2023.0380 (PMC11621655; doi:10.4093/dmj.2023.0380), 2024-07-22
Supplement: dmj-2023-0380-Supplementary-Fig-2.pdf [file dmj-2023-0380-Supplementary-Fig-2.pdf]

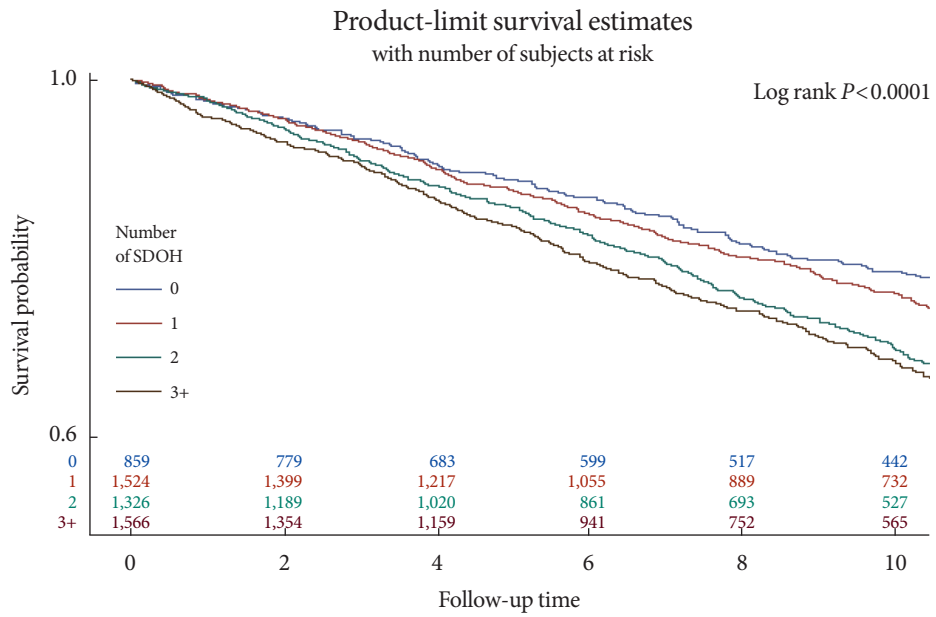

**Supplementary Fig. 2.** Kaplan-Meier curve by number of social determinants of health (SDOH) and composite endpoint.
