# Supplementary material for: Social Determinants of Health and Cardiovascular Risk among Adults with Diabetes: The Reasons for Geographic and Racial Differences in Stroke (REGARDS) Study
Source: PubMed Central journal article supplement — Diabetes Metab J. 2024 Jul 22;48(6):1073–83. doi: 10.4093/dmj.2023.0380 (PMC11621655; doi:10.4093/dmj.2023.0380), 2024-07-22
Supplement: dmj-2023-0380-Supplementary-Table-1.pdf [file dmj-2023-0380-Supplementary-Table-1.pdf]

**Supplementary Table 1.** Multiply imputed effect of SDOH count on composite endpoint

| Model                | HR (95% CI)      |                  |                  | P for trend |
|----------------------|------------------|------------------|------------------|-------------|
|                      | 1 SDOH           | 2 SDOH           | ≥3 SDOH          |             |
| Age and sex adjusted | 1.13 (0.96–1.33) | 1.48 (1.26–1.74) | 1.68 (1.43–1.96) | <0.001      |
| Model 1              | 1.14 (0.97–1.34) | 1.52 (1.29–1.79) | 1.77 (1.50–2.08) | <0.001      |
| Model 2              | 1.11 (0.94–1.31) | 1.44 (1.23–1.70) | 1.60 (1.36–1.88) | <0.001      |
| Model 3              | 1.10 (0.94–1.30) | 1.42 (1.20–1.67) | 1.55 (1.32–1.83) | <0.001      |
| Model 4              | 1.06 (0.90–1.25) | 1.30 (1.10–1.54) | 1.41 (1.19–1.66) | <0.001      |
| Model 5              | 1.05 (0.89–1.23) | 1.26 (1.07–1.49) | 1.35 (1.14–1.59) | <0.001      |
| Model 6              | 1.01 (0.85–1.19) | 1.19 (1.01–1.40) | 1.27 (1.07–1.50) | <0.001      |

Crude model adjusts for age and sex. Model 1: crude model+demographics (black race, Stroke Belt/Buckle residence); Model 2: model 1+medical conditions (hypertension, hyperlipidemia, history of heart disease or stroke); Model 3: model 2+medication use (antihypertensives, statins, insulin); Model 4: model 3+functional status (Short Form-12 physical and mental component scores); Model 5: model 4+health behaviors (smoking, risky alcohol consumption, physical activity, adherence to Mediterranean diet, medication adherence); Model 6: model 5+physiologic factors (body mass index, blood pressure, total and high-density lipoprotein cholesterol, C-reactive protein, urinary albumin/creatinine ratio, estimated glomerular filtration rate).

SDOH, social determinants of health; HR, hazard ratio; CI, confidence interval.
