# Supplementary material for: Social Determinants of Health and Cardiovascular Risk among Adults with Diabetes: The Reasons for Geographic and Racial Differences in Stroke (REGARDS) Study
Source: PubMed Central journal article supplement — Diabetes Metab J. 2024 Jul 22;48(6):1073–83. doi: 10.4093/dmj.2023.0380 (PMC11621655; doi:10.4093/dmj.2023.0380), 2024-07-22
Supplement: dmj-2023-0380-Supplementary-Table-2.pdf [file dmj-2023-0380-Supplementary-Table-2.pdf]

**Supplementary Table 2.** HRs of composite endpoint in individuals without and with history of heart disease from minimally and fully adjusted models, by number of SDOH

| Model                                        | HR (95% CI)      |                  |                  | P for trend |
|----------------------------------------------|------------------|------------------|------------------|-------------|
|                                              | 1 SDOH           | 2 SDOH           | ≥3 SDOH          |             |
| Individuals with no history of heart disease |                  |                  |                  |             |
| Age and sex adjusted                         | 1.08 (0.87–1.35) | 1.49 (1.20–1.84) | 1.78 (1.44–2.21) | <0.001      |
| Fully adjusted                               | 0.97 (0.77–1.21) | 1.18 (0.95–1.47) | 1.36 (1.08–1.70) | <0.001      |
| Individuals with history of heart disease    |                  |                  |                  |             |
| Age and sex adjusted                         | 1.18 (0.93–1.51) | 1.38 (1.08–1.76) | 1.43 (1.12–1.83) | 0.002       |
| Fully adjusted                               | 1.08 (0.84–1.38) | 1.19 (0.92–1.54) | 1.16 (0.89–1.51) | 0.221       |

Fully adjusted model adjusts for demographics (black race, Stroke Belt/Buckle residence), medical conditions (hypertension, hyperlipidemia, history of heart disease or stroke), medication use (antihypertensives, statins, insulin), functional status (Short Form-12 physical and mental component scores), health behaviors (smoking, risky alcohol consumption, physical activity, adherence to Mediterranean diet, medication adherence), and physiologic factors (body mass index, blood pressure, total and high-density lipoprotein cholesterol, C-reactive protein, urinary albumin/creatinine ratio, estimated glomerular filtration rate).

HR, hazard ratio; SDOH, social determinants of health; CI, confidence interval.
